# Supplementary material
Source: PubMed Central journal article supplement (PMC4456216)

Figure 1b

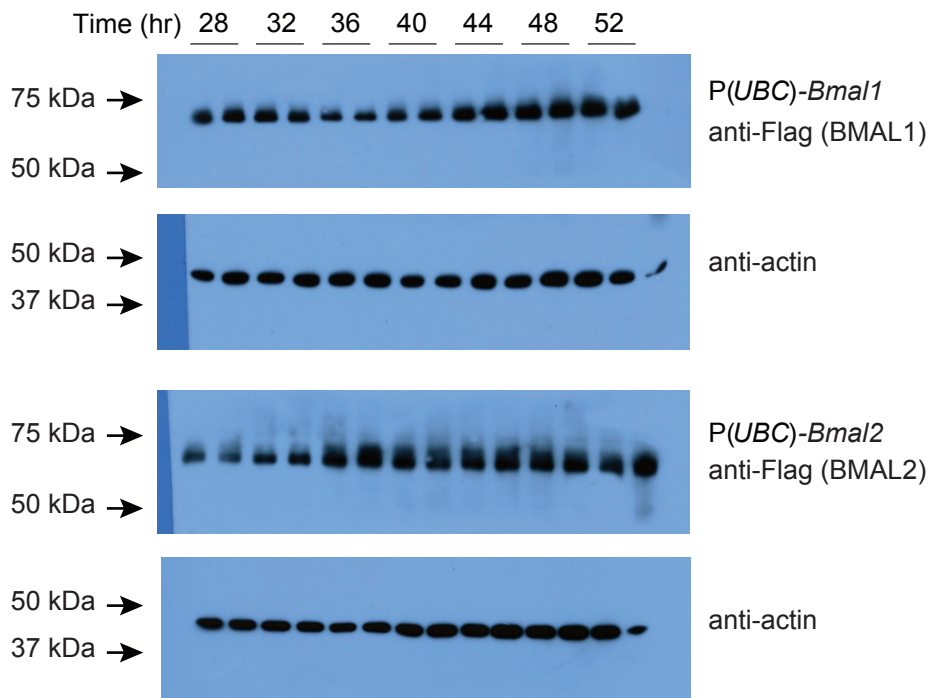

Figure 6b

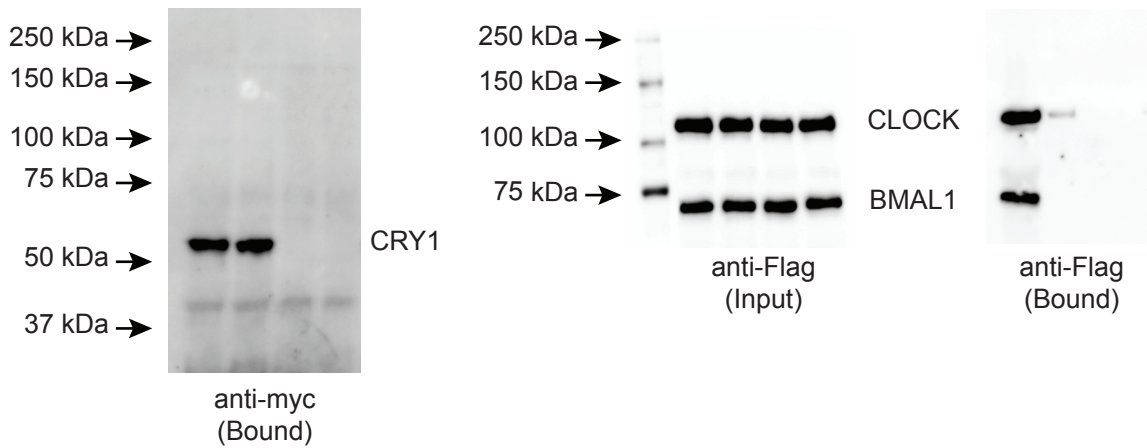

Supplement: NIHMS678405-supplement-1.pdf [file NIHMS678405-supplement-1.pdf]
